# Supplementary material
Source: PubMed Central journal article supplement (PMC7362330)
Supplement: NIHMS1050251-supplement-Supp_info.pdf [file NIHMS1050251-supplement-Supp_info.pdf]

## Supplemental Figure S1.

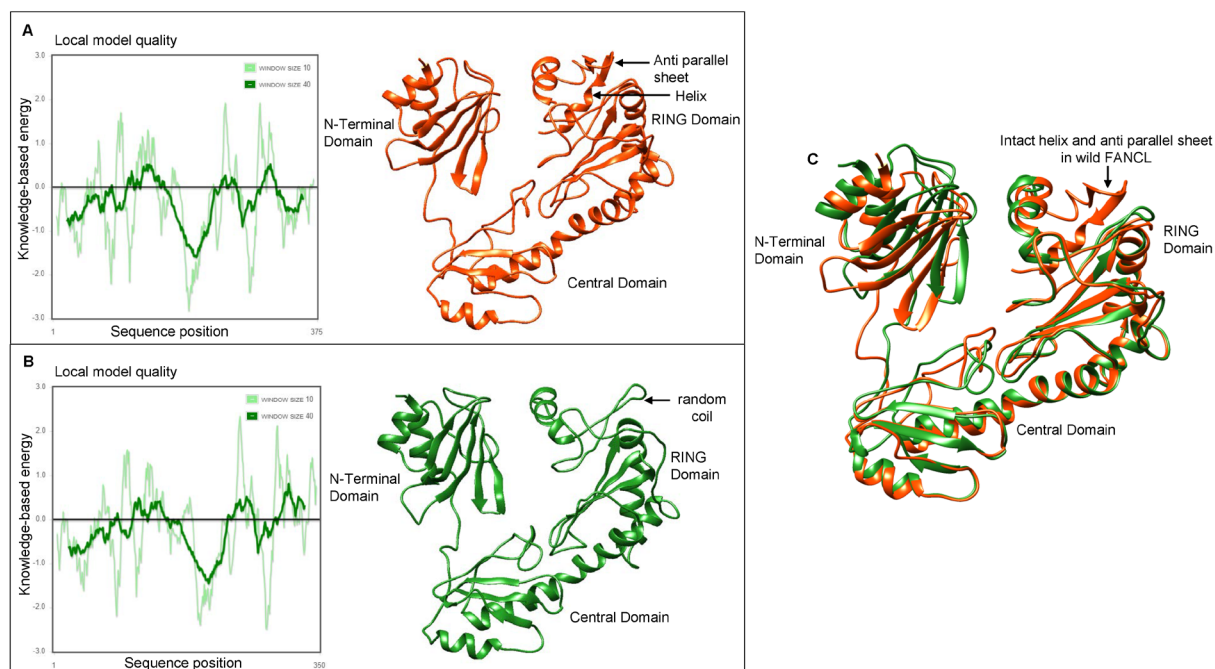

PROSA based local model quality analysis to estimate the overall knowledge-based energy [Left] and structures generated using GenTHREADER [Right]. (A) wild-type FANCL and (B) mutant FANCL p.W341\_K364del. (C) Structural superimposition of wild-type FANCL with mutant FANCL p.W341\_K364del. The wild-type is shown in orange color and the mutant in green color.

**Supplemental Figure S2.**

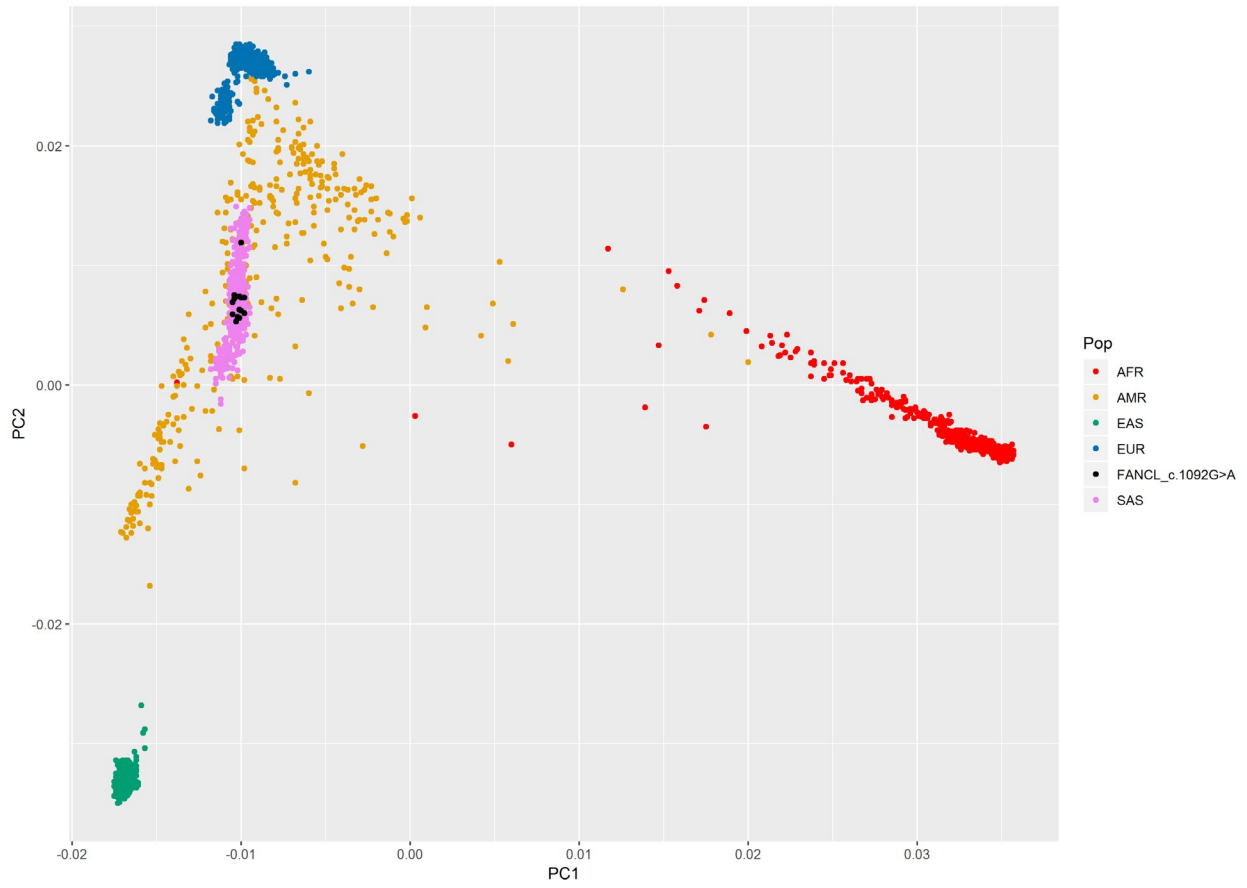

Population stratification *via* multi-dimensional scaling analysis of the fourteen genotyped individuals from our study (FANCL\_c.1092G>A) and the 2,501 individuals from the 1000 Genomes Project Phase 3 cohort. AFR – African; AMR – Ad Mixed American; EAS – East Asian; EUR – European; SAS – South Asian.

**Supplemental Table S1. Summary of chromosome breakage test results.**

| Individuals | With MMC          |               |                   |                        |                                      | Without MMC       |               |                   |
|-------------|-------------------|---------------|-------------------|------------------------|--------------------------------------|-------------------|---------------|-------------------|
|             | No. of metaphases | No. of breaks | Breaks/ metaphase | Metaphases with breaks | No. of breaks/ metaphase with breaks | No. of metaphases | No. of breaks | Breaks/ metaphase |
| IN01        | 52                | 85            | 1.6               | 19                     | 4.47                                 | 25                | 5             | 0.2               |
| IN02        | 48                | 112           | 2.33              | 23                     | 4.86                                 | 20                | 16            | 0.8               |
| IN03        | 45                | 113           | 2.5               | 34                     | 3.32                                 | 22                | 11            | 0.5               |
| IN04        | 50                | 72            | 1.44              | 32                     | 2.25                                 | 33                | 7             | 0.2               |
| IN05        | 45                | 53            | 1.18              | 20                     | 2.65                                 | 30                | 3             | 0.1               |
| IN06        | 54                | 141           | 2.6               | 25                     | 5.64                                 | 28                | 18            | 0.6               |
| IN07        | 50                | 185           | 3.7               | 23                     | 8                                    | 25                | 26            | 1.0               |
| IN08        | 50                | 155           | 3.1               | 25                     | 6.2                                  | 27                | 20            | 0.7               |
| IN09        | 51                | 53            | 1.03              | 19                     | 2.78                                 | 23                | 3             | 0.1               |
| IN10        | 54                | 135           | 2.5               | 25                     | 5.4                                  | 32                | 22            | 0.6               |
| TKFA33*     | 100               | 70            | 0.7               | 28                     | 2.5                                  | 100               | 6             | 0.06              |
| FA17*       | 30                | 60            | 2                 | 5                      | 12                                   | 50                | 7             | 0.14              |
| FA91*       | 20                | 161           | 8.1               | 18                     | 8.9                                  | 50                | 21            | 0.42              |

\*DEB (0.1ug/ml) was used, instead of MMC, as the crosslinking agent to induce chromosomal breakage in these three samples.

**Supplemental Table S2. In silico prediction results for the effect on mRNA splicing from the *FANCL* chr2:58387243C>T variant.**

| Prediction Method     | Predicted Effect/Score                                                                                           |
|-----------------------|------------------------------------------------------------------------------------------------------------------|
| Human Splicing Finder | Broken Donor Site: "most probably affecting splicing"                                                            |
| MaxEnt                | Score difference of 2.91 (decreased from 10.22 (ref score) to 7.31 (mut score))                                  |
| SpliceAI              | Delta score of 0.76 for Donor Loss<br>(Probability that chr2:58387243 is used as a donor site decreases by 0.76) |
| CADD                  | PHRED-scaled value of 23.8                                                                                       |
